# Supplementary material for: Impacts of air fraction increase on Arctic sea-ice thickness retrieval during melt season
Source: Copernicus journal article supplement (doi:10.5194/egusphere-2024-2398), 2024-09-10
Supplement: Supplementary file [file egusphere-2024-2398-AC4-supplement.pdf]

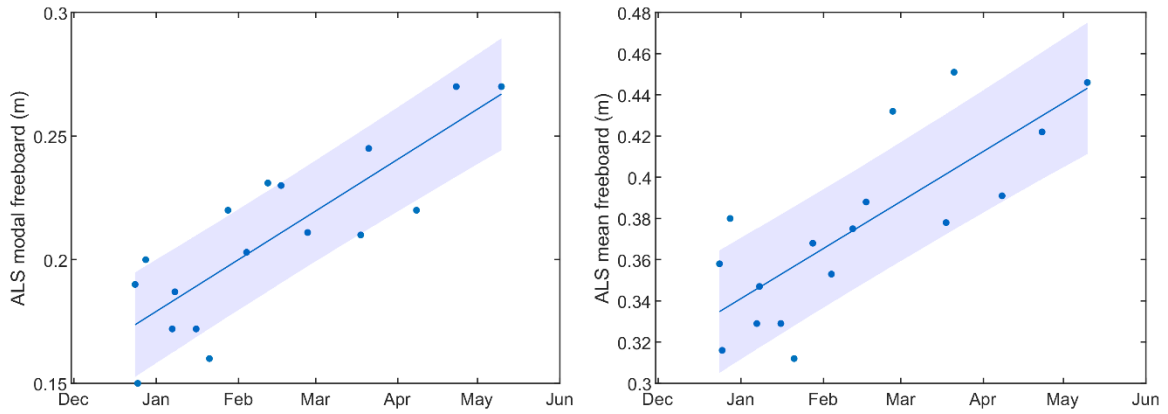

Figure RC4-1: Modal (left) and mean (right) freeboard for full ALS surveys during the freezing season.

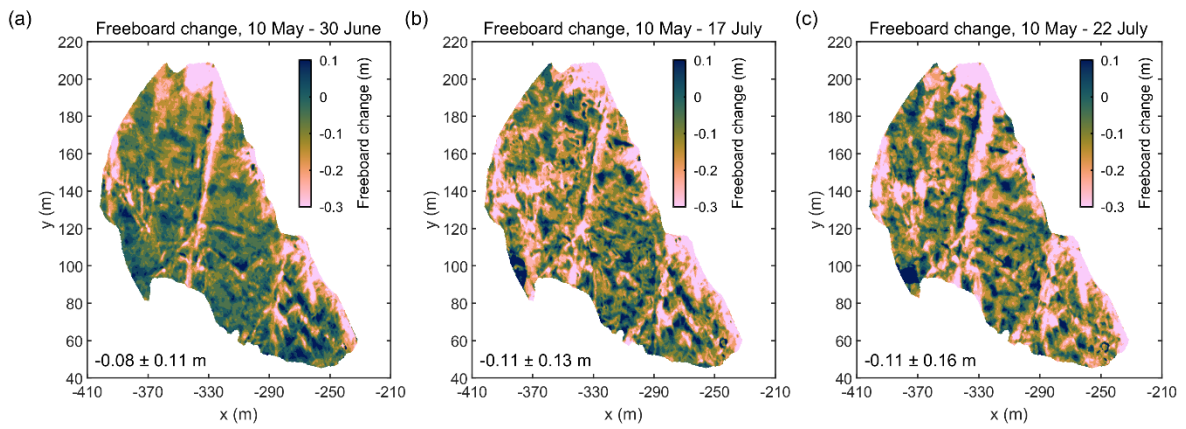

Figure RC4-2: Snow/SSL freeboard change between 10 May and 30 June (a), 17 July (b), and 22 July (c).
